# Supplementary material
Source: Springer Nature journal article supplement (https://www.springermedizin.de/resource/supplementary/13075_2011_3196_MOESM4_ESM.pdf/9694008)

| +/- DEX Pre-treatment | TNF $\alpha$ ; No DEX |
|-----------------------|-----------------------|
| Day -2 to Day 0       | Day 0 to Day 4        |

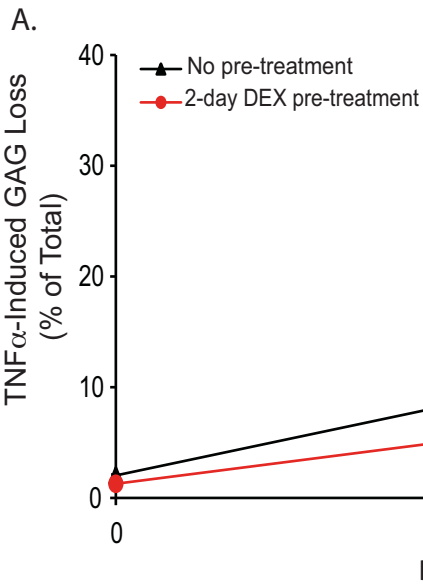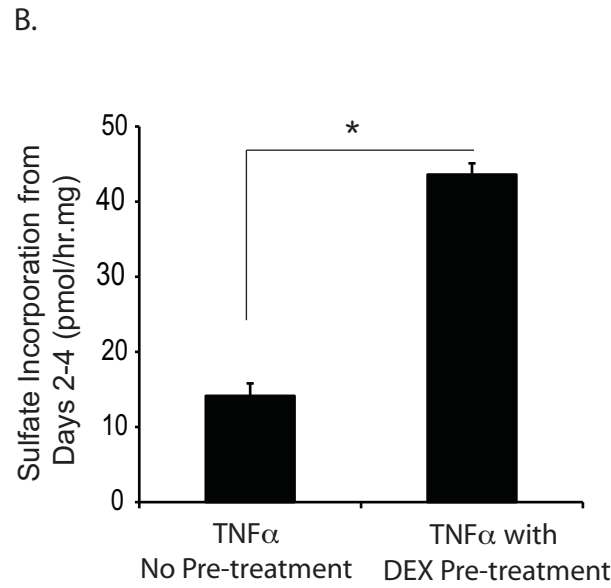

| TNF $\alpha$    | TNF $\alpha$ +/- DEX Post-Treatment |
|-----------------|-------------------------------------|
| Day -2 to Day 0 | Day 0 to Day 4                      |

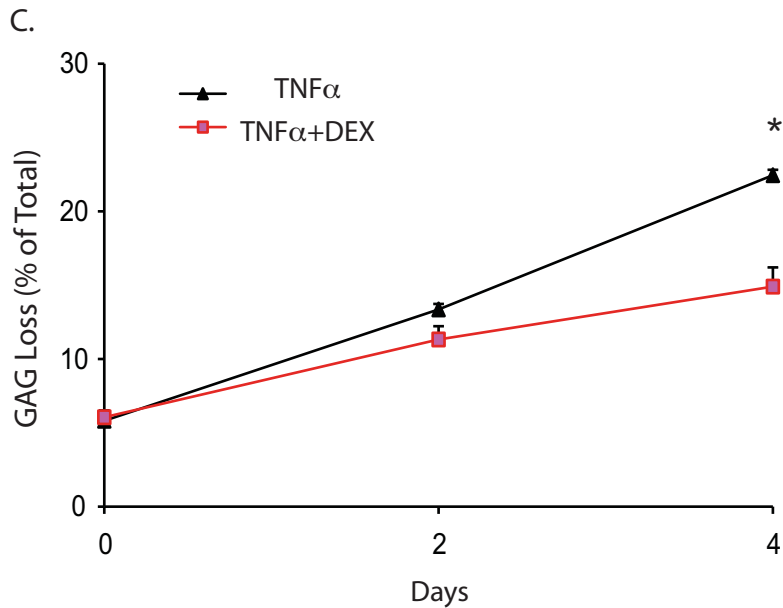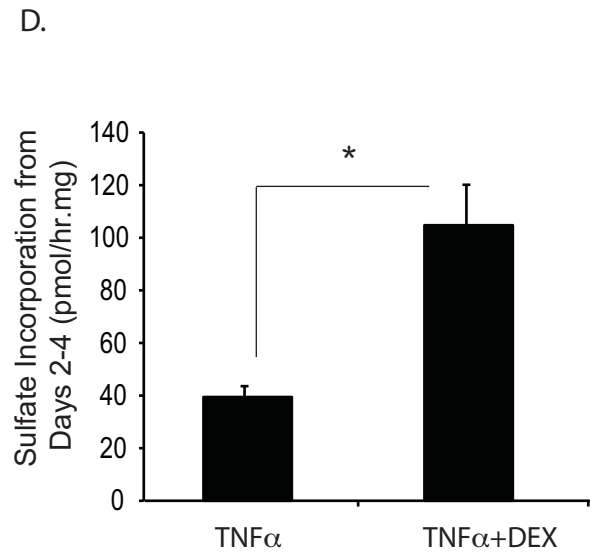

Supplement: MOESM4 [file 9694008]
